# Supplementary material for: Pressure regulated CO2 electrolysis on two-dimensional Bi2O2Se
Source: Royal Society of Chemistry journal article supplement (doi:10.1039/d4cc05357e), 2025-01-01
Supplement: d4cc05357e1.pdf [file d4cc05357e1.pdf]

## 1 **Supplementary information**

### 2 Pressure regulated CO<sub>2</sub> electrolysis on two-dimensional Bi<sub>2</sub>O<sub>2</sub>Se

3 Ruofan Sun,<sup>a†</sup> Jiwu Zhao,<sup>a†</sup> Hang Liu,<sup>a</sup> Yanrong Xue,<sup>a</sup> Xu Lu<sup>a\*</sup>

4 <sup>a</sup> Division of Physical Science and Engineering (PSE), King Abdullah University of Science and Technology (KAUST),  
5 Thuwal, 23955-6900, Kingdom of Saudi Arabia.

6 † These authors contributed equally.

7 \* Corresponding author. Email: Xu Lu (xu.lu@kaust.edu.sa).

## 9 Experimental

### 10 Catalyst synthesis and electrode preparation

11 A homemade CVD furnace was utilized to grow the 2D Bi<sub>2</sub>O<sub>2</sub>Se on a glassy carbon substrate under low pressure conditions.  
12 Initially, a 10 nm layer of Bi<sub>2</sub>O<sub>3</sub> was deposited onto the glassy carbon substrate at a rate of 0.01 nm/s using an E-beam evaporator  
13 (Denton Vacuum, LLC), with Bi<sub>2</sub>O<sub>3</sub> powder (99.99% purity, Alfa) as the source material. Subsequently, the glassy carbon substrate  
14 with the deposited Bi<sub>2</sub>O<sub>3</sub> and 1 g of Se powder (99.99% purity, Alfa) were positioned in the central and upstream heating zones  
15 of the furnace, approximately 10 cm from the center. Prior to heating the furnace, the quartz tube was purged with 1000 sccm  
16 of Ar for 5 minutes. Subsequently, the furnace temperature was ramped up to 500°C at a rate of 5°C/min and held constant for  
17 20 minutes with a continuous flow of Ar at 200 sccm to conduct the selenization process. The pressure was maintained at 200  
18 Torr throughout the entire CVD process. The Bi<sub>2</sub>O<sub>2</sub>Se bulk were synthesized with a similar method. In brief, 10mg Bi<sub>2</sub>O<sub>3</sub> and 1 g  
19 of Se powder were positioned in furnace to conduct the selenization process. Two milligrams of prepared Bi<sub>2</sub>O<sub>2</sub>Se bulk were first  
20 dispersed in 1 mL of ethanol (EtOH) with the addition of 20 µL of a 5 wt% Nafion solution. This suspension was then dropped cast  
21 onto the glassy carbon with the catalyst loading of 0.5 mg cm<sup>-2</sup>. All the catalyst electrodes were tested with an active area of  
22 1cm<sup>2</sup>.

### 23 Electrochemical measurement

24 All electrochemical measurements were performed at room temperature using an electrochemical workstation (BioLogic SP-150  
25 Potentiostat). A Pt foil served as the counter electrode and an Ag/AgCl electrode (saturated KCl) was used as the reference  
26 electrode. All potentials recorded against the Ag/AgCl reference electrode (without iR correction) were converted to the  
27 reversible hydrogen electrode (RHE) scale using the formula:  $E_{RHE} = E_{Ag/AgCl} + 0.21 \text{ V} + 0.0591 * \text{pH}$ , where pH represents the pH  
28 value of the solution.

29 For high-pressure measurements, we utilized a customized two-compartment high-pressure H-cell constructed from Teflon-lined  
30 titanium as previous work<sup>1</sup>. The two compartments were separated by a proton exchange membrane (Nafion 117, Fuel Cell Store),  
31 with each containing 100 mL of 0.5M KHCO<sub>3</sub> aqueous solution and connected to an independent pressure regulator. Inside the  
32 cathode compartment, the working electrode (1 × 0.5 cm) and reference electrode (Ag/AgCl with saturated KCl, Gaoss Union)  
33 were placed, while the counter electrode (Pt foil, 1 × 1 cm) was located in the anode compartment. A small hole was drilled on  
34 the top of the reference electrode to balance its internal and external pressure. Before conducting tests, the electrolytes in each  
35 compartment were purged for 5 minutes using CO<sub>2</sub> and then allowed to equilibrate for 30 minutes under the desired pressure  
36 (ranging from 1 to 40 bar). Gas products in the headspace of the cathode compartment were sampled using 10 mL air-tight  
37 syringes from an outlet relief valve and then injected into a gas chromatograph (GC) system.

### 38 The determination of electrolyte pH at high pressure

39 Step 1: Calculate dissolved CO<sub>2</sub> concentration using Henry's Law

$$40 \quad [CO_2] = K_H \cdot P_{(CO_2)}$$

41 Step 2: Determine carbonic acid concentration

$$42 \quad \frac{a}{b} + \frac{c}{d} = \frac{[CO_2]}{1 + \frac{[H^+]}{K_{a1}}}, \text{ where } K_{a1} = 4.3 \times 10^{-7}.$$

43 Step 3: Calculate bicarbonate concentration

$$44 \quad [HCO_3^-] = [H_2CO_3] * [H^+] * C_{KHCO_3}, \text{ where } C_{KHCO_3} = 0.5M \text{ is the initial bicarbonate concentration.}$$

45 Step 4: Calculate carbonate concentration

$$46 \quad [CO_3^{2-}] = [HCO_3^-] * \frac{K_{a2}}{[H^+]}, \text{ where } K_{a2} = 4.8 \times 10^{-11}.$$

47 Step 5: Charge balance equation

$$48 [H^+] + [K^+] = [OH^-] + [HCO_3^-] + 2[CO_3^{2-}]$$

49 Step 6: Iterative solution for  $[H^+]$

50 Use the equation above to solve for  $[H^+]$ .

51 Step 7: Calculate  $pH = -\log_{10}([H^+])$

## 52 Product analysis

53 Gas products were analyzed using a GC (Trace 1310, Thermo Scientific) equipped with Molecular Sieve 5A and Poropak columns.  
54 Ar (Al Khafrah Industrial Gases, 99.999%) served as the carrier gas. CO, CH<sub>4</sub>, C<sub>2</sub>H<sub>4</sub>, and C<sub>2</sub>H<sub>6</sub> were quantified using a flame  
55 ionization detector (FID) with a methanizer, while H<sub>2</sub> was quantified using a thermal conductivity detector (TCD). The gas in the  
56 compartment's headspace were collected using 10 mL air-tight syringes via an outlet relief valve and analyzed with a gas  
57 chromatograph (GC) system. The volumes of the gas products were determined by analyzing the corresponding peak areas with  
58 reference to calibration curves. Liquid products were detected by a 1H NMR spectrometer (Bruker, 600 MHz) employing the  
59 water suppression method. For each liquid sample, 480 μL of the electrolytes were mixed with 120 μL of internal standards,  
60 consisting of 200 ppm of dimethyl sulfoxide (DMSO) in deuterium oxide (D<sub>2</sub>O) and distilled water.

61 The Faradaic efficiency (FE) of a specific product (p) was calculated using the equation:

$$62 FE(p) = \frac{z * n * F}{Q} * 100(\%)$$

63 where z represents the number of the electrons transferred to one p molecule, n denotes the total moles of the product, F is the  
64 Faradaic constant ( $F = 96,485 \text{ C mol}^{-1}$ ), and Q indicates the total number of electrons transferred.

## 65 Electrochemically active surface areas (ECSA) calculation

66 The electrochemically active surface area (ECSA) is calculated using the formula  $ECSA = R_f * S$ . Here, S denotes the real surface  
67 area of the smooth metal electrode, which generally equals the geometric area of the carbon paper electrode ( $S = 1.0 \text{ cm}^2$  in this  
68 study). The roughness factor (Rf) is derived from the ratio of the double-layer capacitance (Cdl) of the working electrode to that  
69 of a smooth metal electrode.

70 Assuming an average double-layer capacitance of  $21 \mu\text{F cm}^{-2}$  for a carbon-supported metal surface, Rf is determined as  $R_f = C_{dl} / (21$   
71  $\mu\text{F cm}^{-2})$ .

72 To determine Cdl, the capacitive current associated with double-layer charging is measured from the scan-rate dependence of  
73 cyclic voltammetric stripping. The potential window for cyclic voltammetric stripping is set between 0.3 and 0.4 V versus RHE in  
74 a 0.5 M KHCO<sub>3</sub> solution, with scan rates of 10, 20, 30, 50, 80, and 100 mV s<sup>-1</sup>.

75 The estimation of Cdl involves plotting the change in current density ( $\Delta j = j_a - j_c$ ) at 0.35 V (where  $j_a$  and  $j_c$  are the anodic and  
76 cathodic current densities, respectively) against the scan rate. The slope of this plot provides a value that is twice that of Cdl.

## 77 Materials characterization and in-situ Raman measurement

78 High-resolution transmission electron microscopy (HR-TEM) and electron energy loss spectroscopy (EELS) images were acquired  
79 using an aberration-corrected transmission electron microscope (TEM) equipped with a post-column EELS system. The  
80 microscope, with a Cs probe, was from ThermoFisher Scientific, while the EELS equipment, model GIF-Quantum 966, was from  
81 Gatan, Inc. The analysis was conducted at an operating voltage of 300 kV.

82 The thickness and surface topology of Bi<sub>2</sub>O<sub>2</sub>Se were identified through AFM (Bruker Dimension Icon).

83 X-ray photoelectron spectroscopy (XPS) characterization was performed using a Kratos Analytical AMICUS/ESCA 3400 instrument  
84 equipped with an Mg-anode K $\alpha$  excitation X-ray source ( $h\nu = 1253.6 \text{ eV}$ ) at 10 kV and 10 mA. Binding energies of the elements  
85 were referenced to the C 1s peak at 284.8 eV.

86 *In-situ* Raman spectra were collected using a WITec apyron system equipped with a 633 nm laser beam and a water-immersion  
87 objective lens (Zeiss W Plan-Apochromat 63X/1) in a customized cell according to previous reported work<sup>1</sup>. To prevent laser-  
88 induced surface modification of the catalyst, a power of 30 mW was applied. In the customized in-situ Raman cell, a Pt wire served  
89 as the working electrode (CE), an Ag/AgCl electrode (saturated KCl solution) as the reference electrode (RE), and the cathode and  
90 anode compartments were separated by a Fumasep FKB-PK-130 membrane (Fuel Cell Store). For test at 1.01 bar, the electrolyte  
91 (50 mL 0.5 M KCl) was circulated to the cathode compartment at a flow rate of 2 mL/min. For test at high pressure at 20 bar, we  
92 designed a high-pressure Raman cell according to previous reported work<sup>2</sup>, as shown in Fig. S21. The cell was housed in a stainless-  
93 steel shell capable of withstanding pressures up to 20 atm. It featured a 3 cm × 3 cm window designed for optical measurements.  
94 For standard high-pressure in situ Raman spectroscopy experiments, a 1 cm × 1 cm electrode was affixed to the working electrode  
95 substrate using double-sided copper tape. KHCO<sub>3</sub> solution was then introduced into the cell. Once the stainless-steel shell was  
96 sealed, high pressure was supplied from a CO<sub>2</sub> cylinder, followed by the application of reduction potential.

97 ICP-MS (Agilent, 8800) was used to determine the contents of Bi<sub>2</sub>O<sub>2</sub>Se for as-prepared catalysts. Prior to ICP-MS measurements,  
98 the electrode was digested by an Ultrawave (Milestone, SRC Technology) in HNO<sub>3</sub> for 6 h. The final Bi<sub>2</sub>O<sub>2</sub>Se amount was estimated  
99 as:  $m = C_{(Bi)} / 2 * Mw_{(Bi_2O_2Se)}$ , where the  $C_{(Bi)}$  is the concentration of Bi and  $Mw_{(Bi_2O_2Se)}$  is molecule weight of Bi<sub>2</sub>O<sub>2</sub>Se.

## 100 DFT calculation

101 Density functional theory (DFT) calculations were performed using the Vienna Ab initio Simulation Program (VASP)<sup>3-5</sup>. Core-  
102 valence interactions were calculated using the projector augmented wave (PAW) method<sup>6, 7</sup>. The generalized gradient  
103 approximation within the Perdew–Burke–Ernzerhof functional (GGA-PBE) was employed to account for the exchange-correlation  
104 effects<sup>8</sup>. Additionally, the DFT-D3 method was utilized to incorporate dispersion corrections for van der Waals forces<sup>9</sup>.  
105 Convergence in geometry optimization was reached when the force on each atom fell below 0.02 eV Å<sup>-1</sup>. According to the  
106 experiment facts, Bi (012) facet is employed as the activate surface to convert CO<sub>2</sub> to HCOOH, with different CO<sub>2</sub> coverages of  
107 1/8 (ambient pressure) and 3/8 (high pressure), respectively. A vacuum layer of 18 Å was introduced to eliminate the interaction  
108 between two adjacent slabs. The Brillouin zone sampling was performed using Gamma-centered Monkhorst-Pack (MP) grids<sup>10</sup>,  
109 and the k-point was set as 3\*3\*1 for all the DFT calculations. The data processing was assisted by VASPKIT<sup>11</sup>, QVASP<sup>12</sup> and VESTA<sup>13</sup>  
110 software. The Gibbs free energy difference ( $\Delta G$ ) between initial and final states was denoted as:

$$111 \Delta G = \Delta E + \Delta ZPE - T\Delta S$$

112 where E, ZPE, T and S represent the energy from DFT calculation, zero-point energy, temperature (298.15 K) and entropy,  
113 respectively<sup>14, 15</sup>.

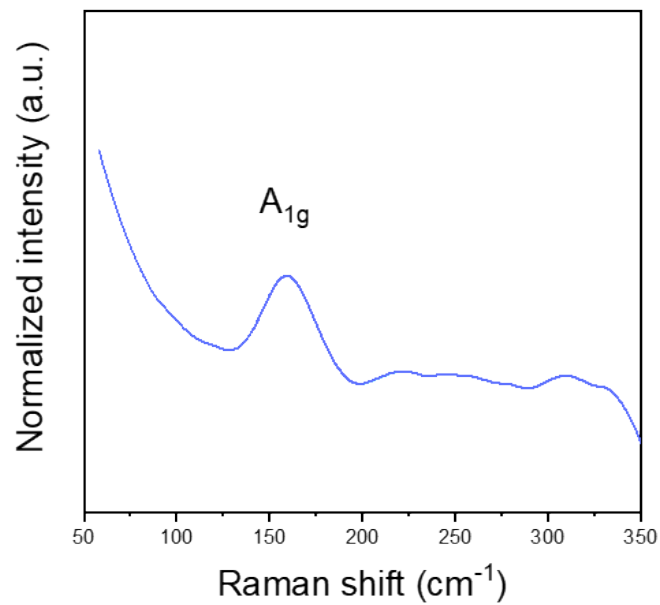

114

115 Fig. S1 Raman characterization on 2D Bi<sub>2</sub>O<sub>2</sub>Se.

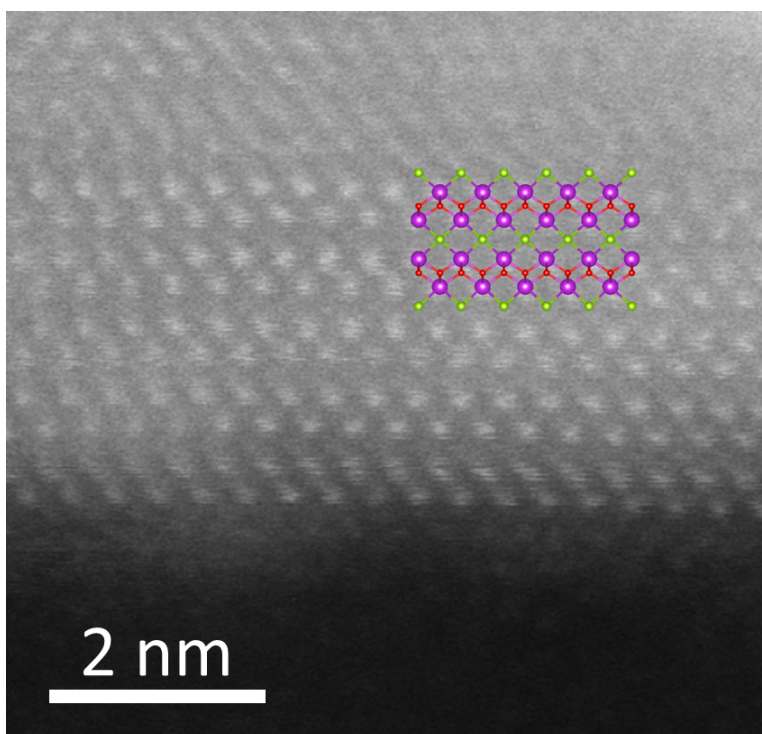

116

117 Fig. S2 Cross-sectional HAADF-STEM image of a Bi<sub>2</sub>O<sub>2</sub>Se.

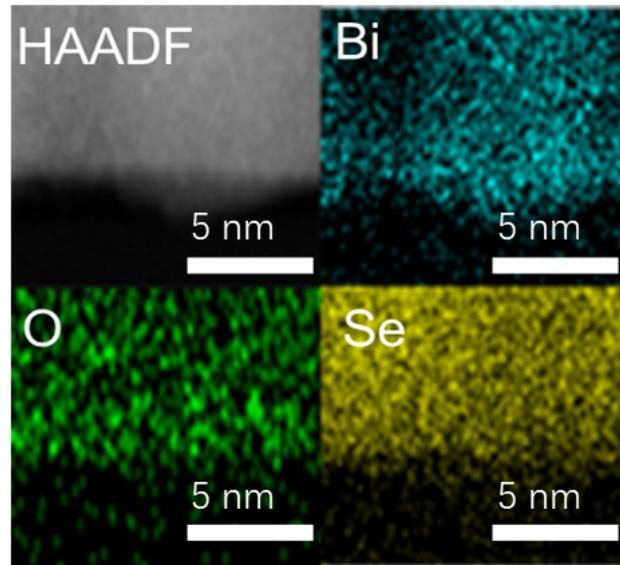

118

119 Fig. S3 The corresponding EELS elemental mapping of Bi, O, Se elements.

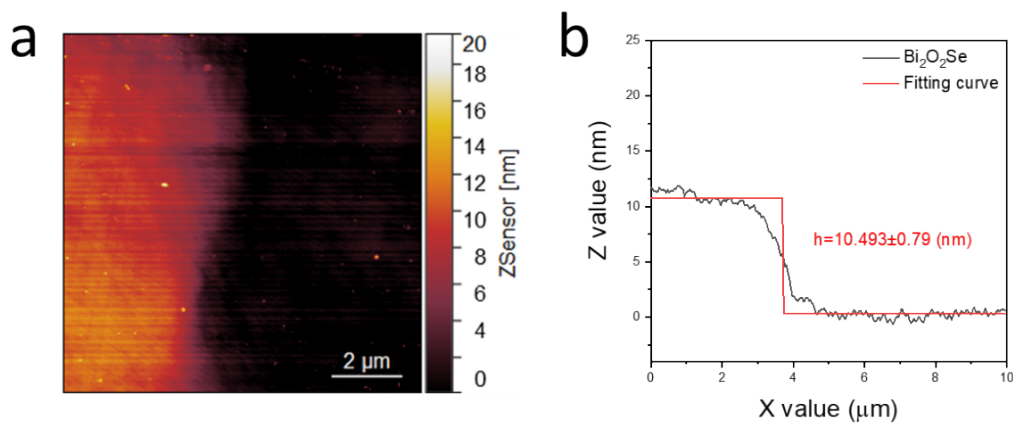

120

121 Fig. S4. (a) Typical atomic force microscopy (AFM) mapping and (b) thickness fitting.

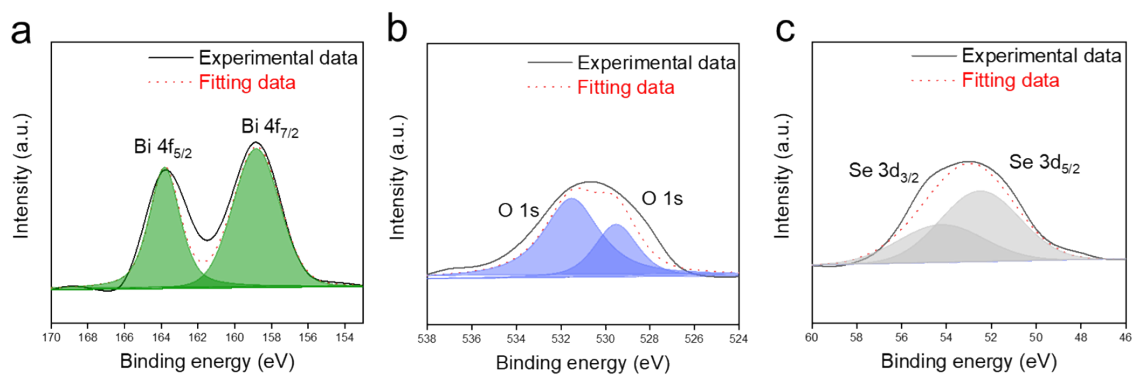

122

123 Fig. S5 XPS analysis of (a) Bi, (b) O and (c) Se elements.

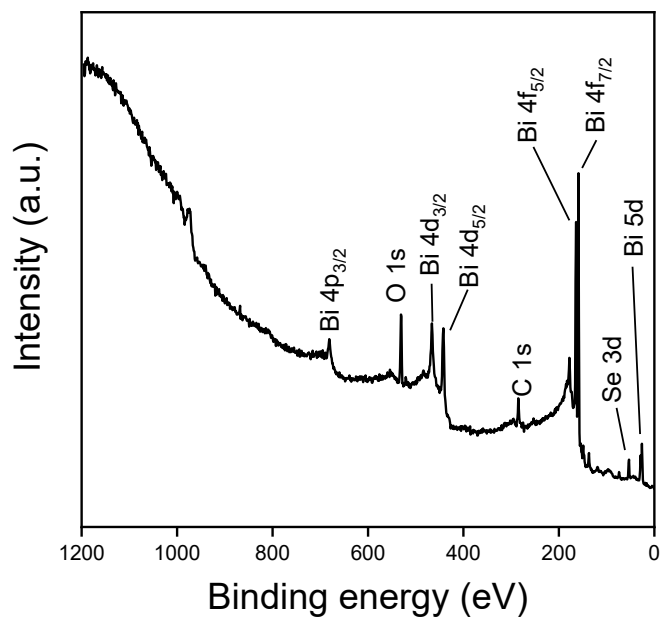

124

125 Fig. S6 X-ray photoelectron spectroscopy (XPS) analysis of wide spectrum.

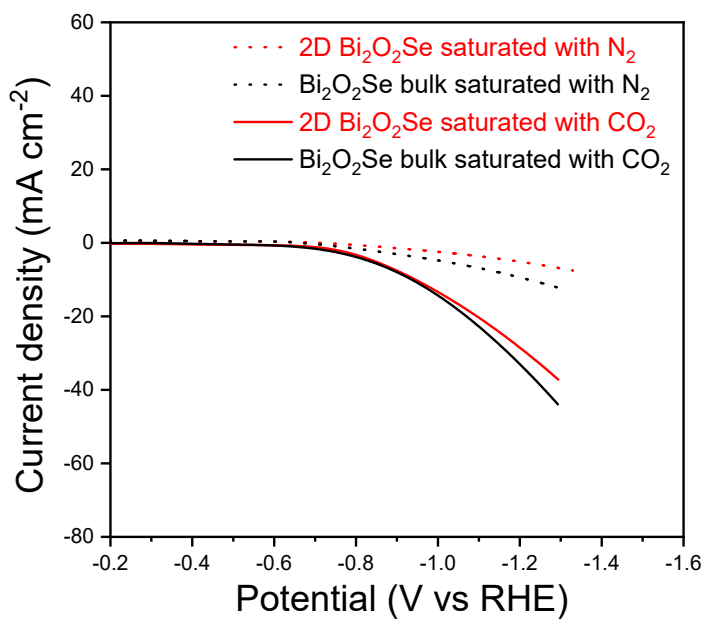

126

127 Fig. S7 Non-Mass-Normalized LSV of 2D  $\text{Bi}_2\text{O}_2\text{Se}$  and  $\text{Bi}_2\text{O}_2\text{Se}$  bulk saturated with  $\text{CO}_2$  and  $\text{N}_2$ .

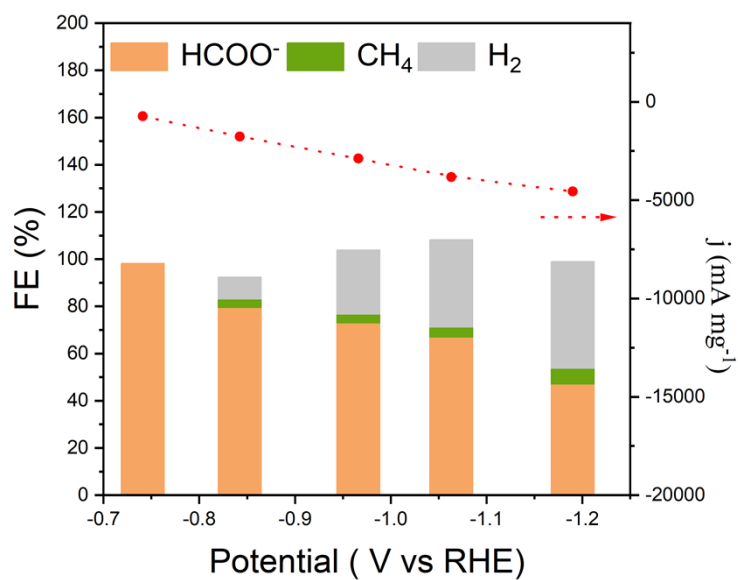

128

129 Fig. S8 FE and current density over 2D Bi<sub>2</sub>O<sub>2</sub>Se at atmosphere pressure.

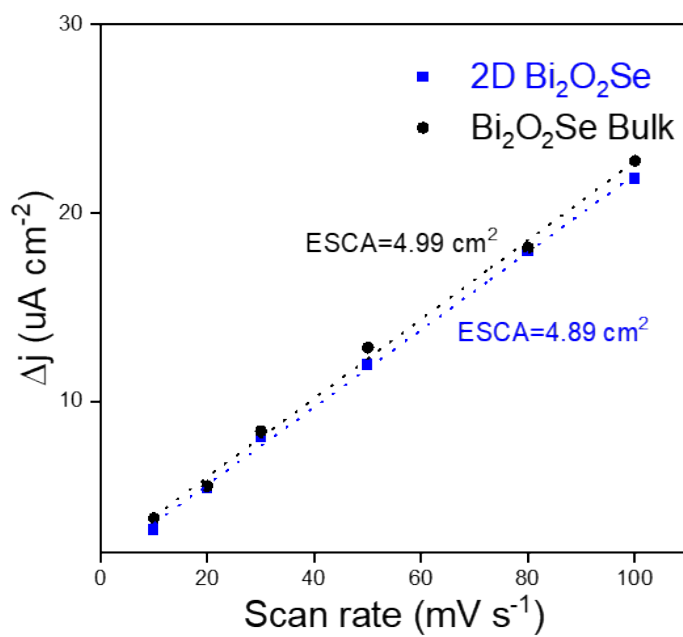

130

131 Fig. S9 Charging current density differences  $\Delta j$  plotted against scan rates on for the calculation of ECSA.



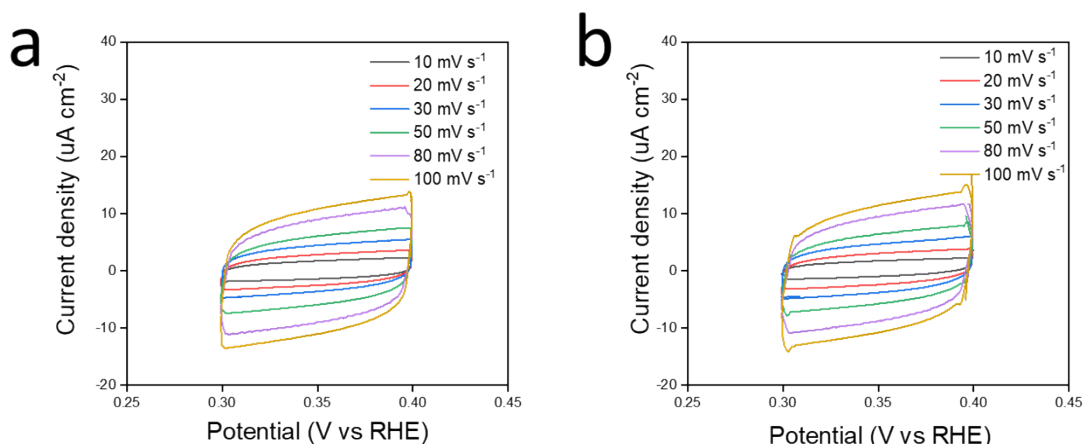

132

133 Fig. S10 Cyclic voltammograms of (a) 2D  $\text{Bi}_2\text{O}_2\text{Se}$  and (b)  $\text{Bi}_2\text{O}_2\text{Se}$  bulk within the potential range from -0.4 to -0.3 (V vs RHE) in 0.5  
 134 M  $\text{KHCO}_3$  electrolyte.

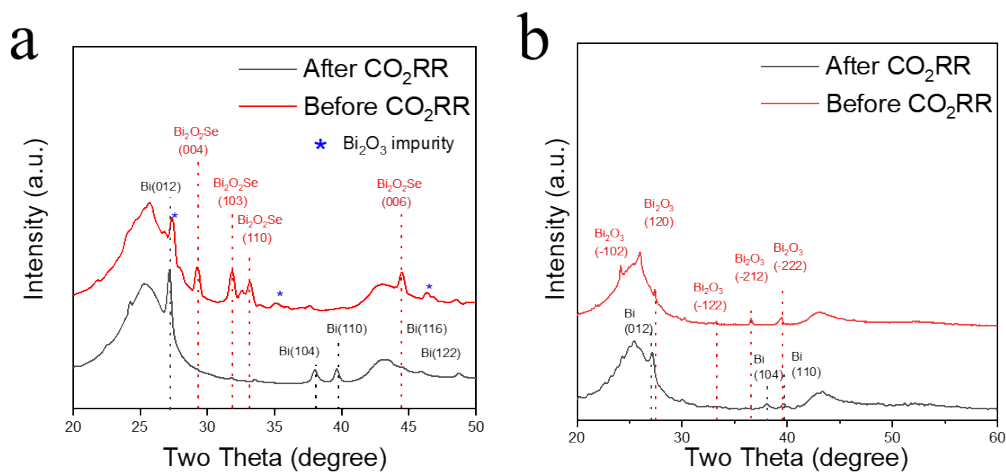

135

136 Fig. S11 XRD measurement before and after  $\text{CO}_2\text{RR}$  for 30 min over (a)  $\text{Bi}_2\text{O}_2\text{Se}$  bulk and (b)  $\text{Bi}_2\text{O}_3$  bulk. For XRD measurement, we  
 137 measured the bulk catalyst electrode due to the weak signal from 2D materials. The peak marked with \* is originated from  $\text{Bi}_2\text{O}_3$   
 138 reactant during the CVD synthesis.

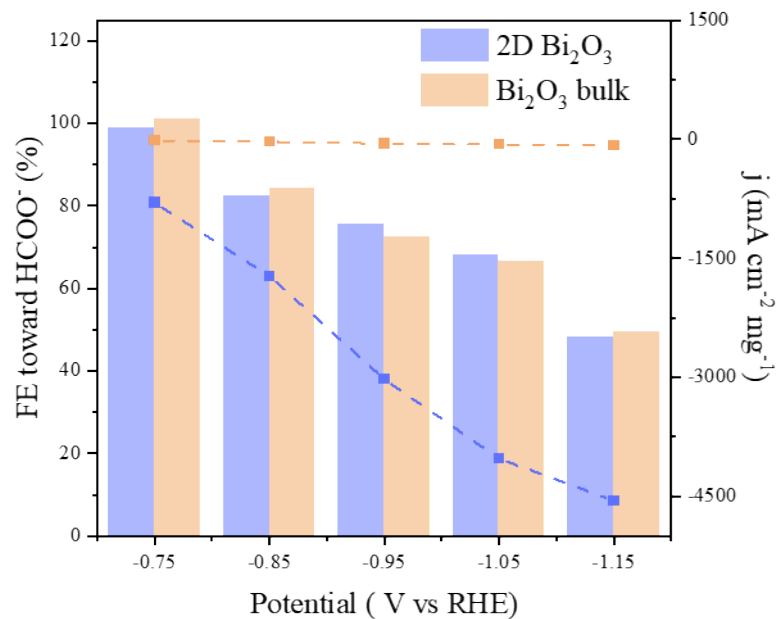

139

140 Fig. S12 CO<sub>2</sub>RR to HCOO<sup>-</sup> performance of 2D Bi<sub>2</sub>O<sub>3</sub> and Bi<sub>2</sub>O<sub>3</sub> bulk at 1.01 bar.

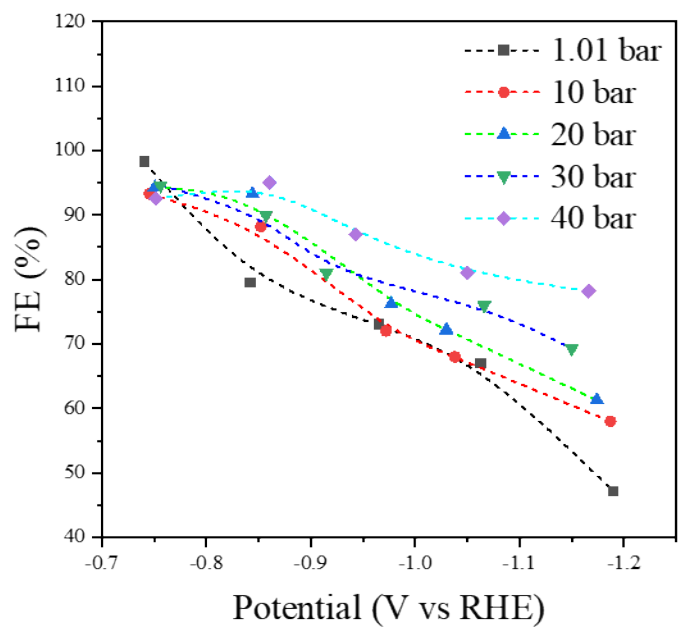

141

142 Fig. S13 Formate FE under CO<sub>2</sub> pressure regulation.

143

144

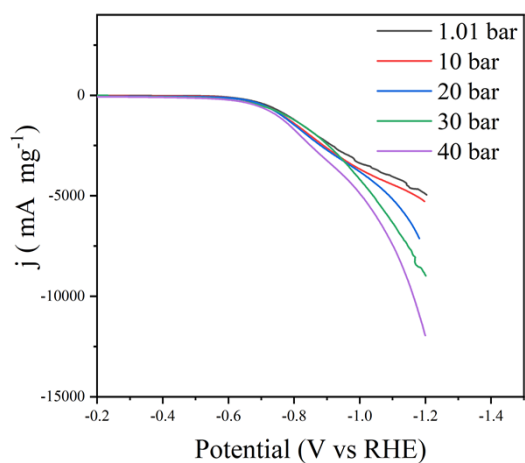

145

146 Fig. S14 LSV of 2D Bi<sub>2</sub>O<sub>2</sub>Se catalyst in CO<sub>2</sub> saturated electrolyte at different CO<sub>2</sub> pressure.

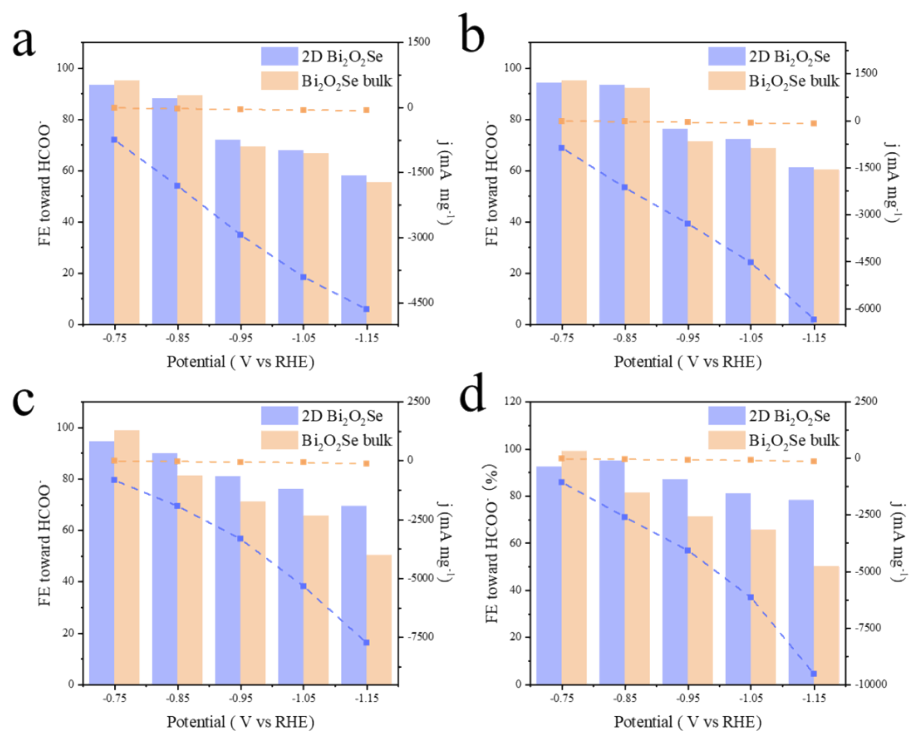

147

148 Fig. S15. FEs and current densities toward CO<sub>2</sub>RR products at (a) 10 bar, (b) 20 bar, (c) 30 bar and (d) 40 bar CO<sub>2</sub> pressure.

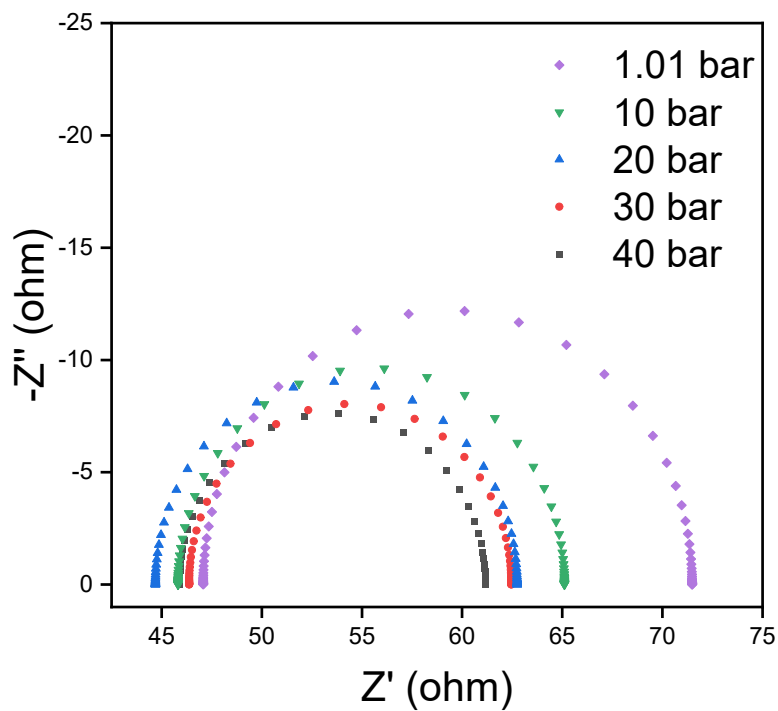

149

150 Fig. S16 Nyquist plots for CO<sub>2</sub>RR over 2D Bi<sub>2</sub>O<sub>2</sub>Se catalyst with increased CO<sub>2</sub> pressure.

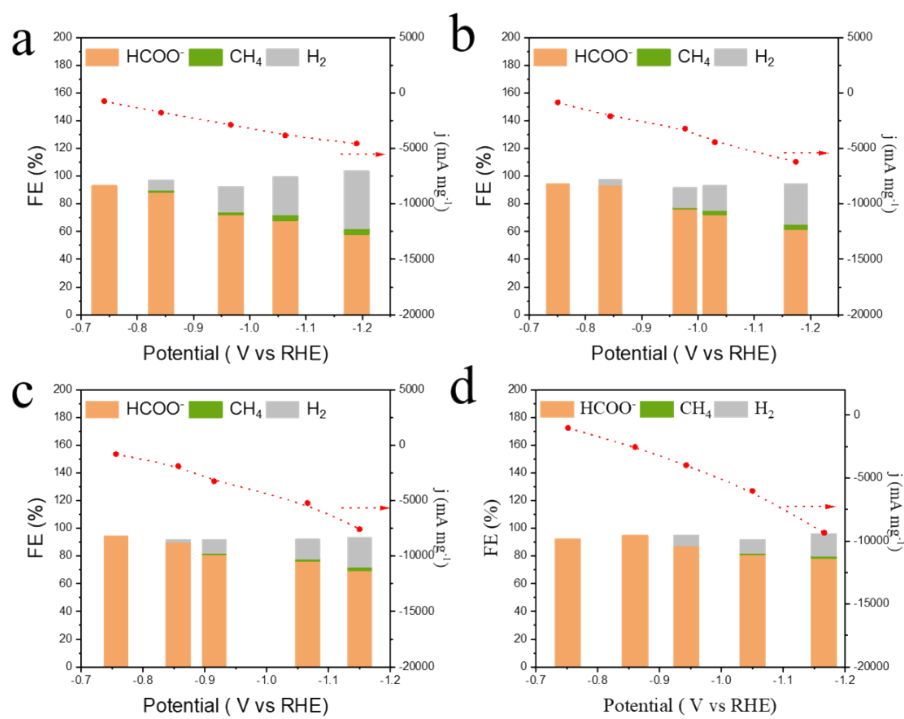

151

152 Fig. S17 FE and current density over 2D Bi<sub>2</sub>O<sub>2</sub>Se at (a) 10 bar, (b) 20 bar, (c) 30 bar and (d) 40 bar CO<sub>2</sub> pressure.

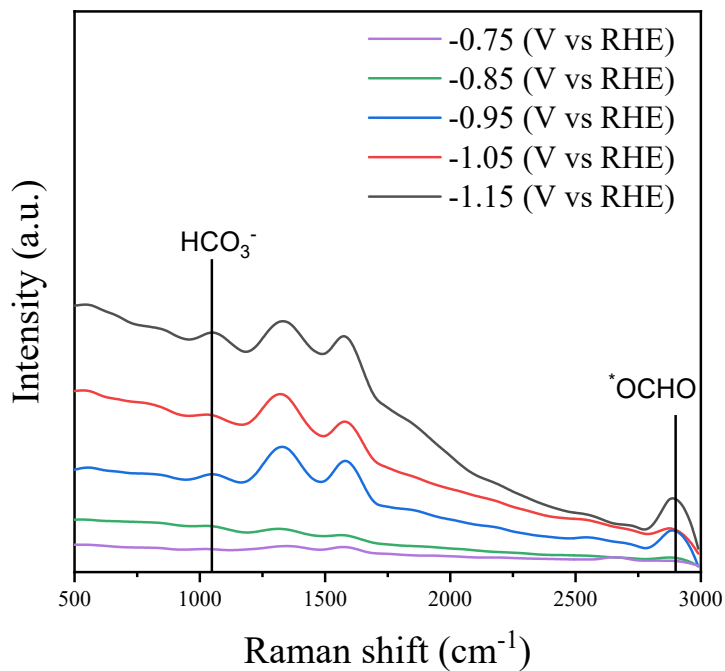

153

154 Fig. S18 *In-situ* Raman analysis on  $\text{CO}_2\text{RR}$  to  $\text{HCO}_3^-$  intermediates over 2D  $\text{Bi}_2\text{O}_2\text{Se}$ .

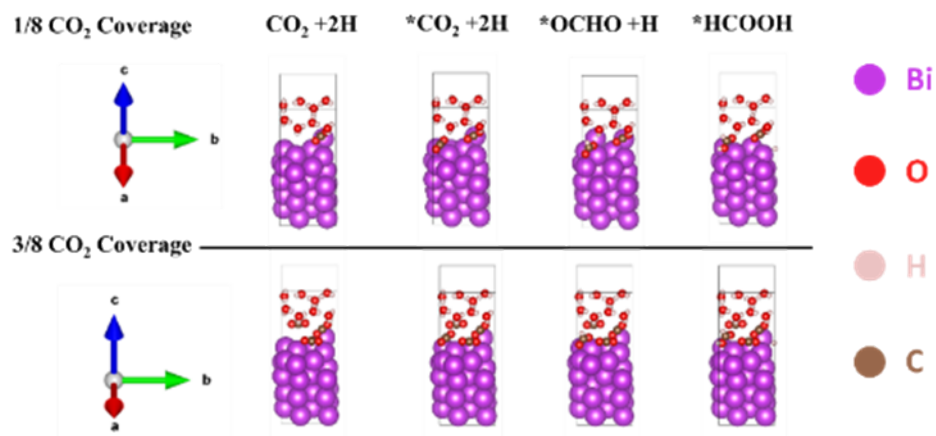

155

156 Fig. S19 Optimized of adsorbed  $\text{CO}_2\text{RR}$  intermediates with the  $\text{CO}_2$  coverages of 1/8 ML and 3/8 ML.

157

158

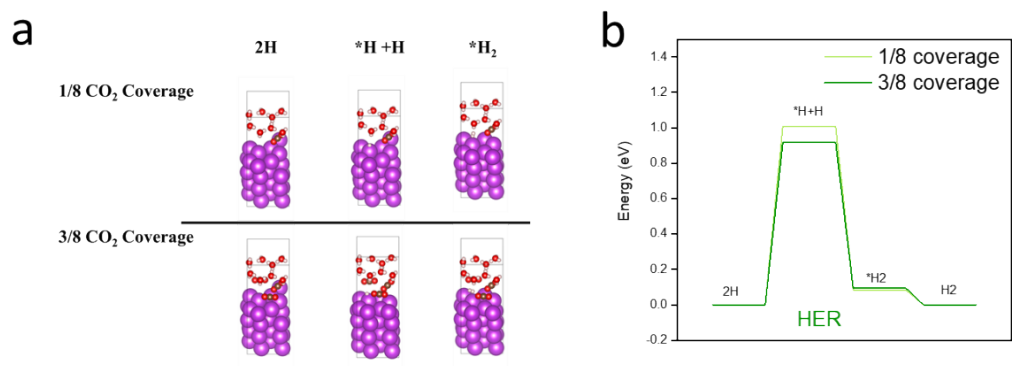

159

160

Fig. S20. (a) Optimized structure and (b) of adsorbed HER intermediates with the CO<sub>2</sub> coverages of 1/8 ML and 3/8 ML.

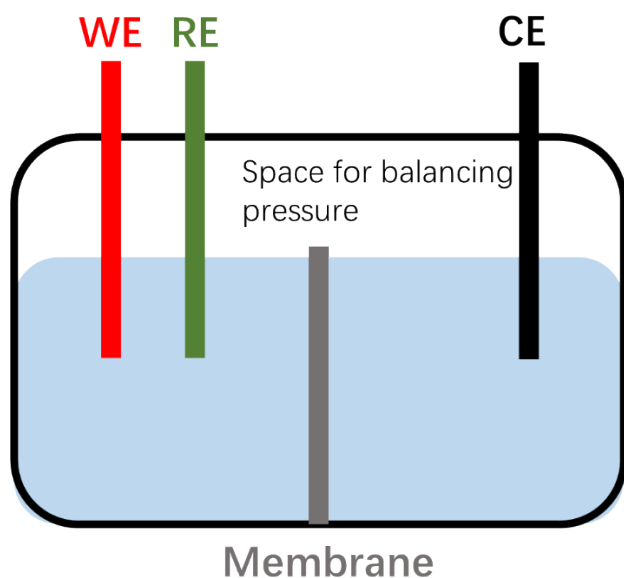

161

162

163

Fig. S20 A simplified schematic of the high-pressure CO<sub>2</sub>RR electrolyzer. The catholyte and anolyte compartments were separated by a membrane, while the shared gas phase was maintained at high CO<sub>2</sub> partial pressures to balance the pressure.

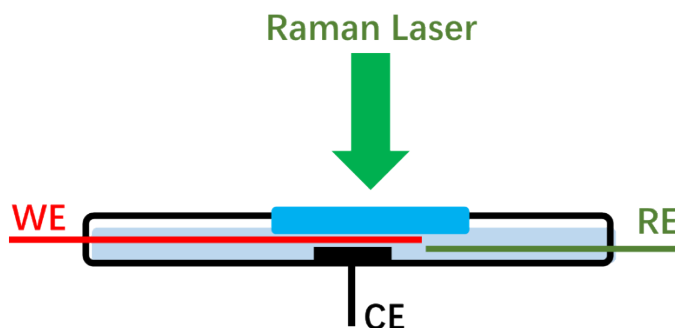

164

165

166

167

168

Fig. S21 A simplified schematic for high-pressure Raman characterization. The high-pressure in situ Raman spectroscopy setup is depicted with a top-view photograph and a side-view schematic. Featuring a three-electrode electrochemical cell housed within a stainless-steel shell and fitted with a sapphire window, the setup facilitates in situ Raman measurements under high-pressure CO<sub>2</sub>RR conditions.

## 169 Notes and references

- 170 1. L. Huang, G. Gao, C. Yang, X.-Y. Li, R. K. Miao, Y. Xue, K. Xie, P. Ou, C. T. Yavuz and Y. Han, *Nature communications*,  
171 2023, **14**, 2958.
- 172 2. J. Li, Y. Kuang, X. Zhang, W.-H. Hung, C.-Y. Chiang, G. Zhu, G. Chen, F. Wang, P. Liang and H. Dai, *Nature Catalysis*, 2023,  
173 **6**, 1151-1163.
- 174 3. G. Kresse and J. Hafner, *Physical review B*, 1993, **47**, 558.
- 175 4. G. Kresse and J. Furthmüller, *Sci*, 1996, **6**, 15.
- 176 5. G. Kresse and J. Furthmüller, *Physical review B*, 1996, **54**, 11169.
- 177 6. P. E. Blöchl, *Physical review B*, 1994, **50**, 17953.
- 178 7. G. Kresse and D. Joubert, *Physical review b*, 1999, **59**, 1758.
- 179 8. J. P. Perdew, K. Burke and M. Ernzerhof, *Physical review letters*, 1996, **77**, 3865.
- 180 9. S. Grimme, S. Ehrlich and L. Goerigk, *Journal of computational chemistry*, 2011, **32**, 1456-1465.
- 181 10. D. J. Chadi and M. L. Cohen, *Physical Review B*, 1973, **8**, 5747.
- 182 11. V. Wang, N. Xu, J. C. Liu, G. Tang and W.-T. Geng, *arXiv preprint arXiv:1908.08269*, 2019.
- 183 12. W. Yi, G. Tang, X. Chen, B. Yang and X. Liu, *Computer Physics Communications*, 2020, **257**, 107535.
- 184 13. K. Momma and F. Izumi, *Journal of applied crystallography*, 2011, **44**, 1272-1276.
- 185 14. J. K. Nørskov, J. Rossmeisl, A. Logadottir, L. Lindqvist, J. R. Kitchin, T. Bligaard and H. Jonsson, *The Journal of Physical*  
186 *Chemistry B*, 2004, **108**, 17886-17892.
- 187 15. J. Zhang, J. Ma, T. S. Choksi, D. Zhou, S. Han, Y.-F. Liao, H. B. Yang, D. Liu, Z. Zeng and W. Liu, *Journal of the American*  
188 *Chemical Society*, 2022, **144**, 2255-2263.

189

190

191
